# Supplementary material
Source: HighWire-hosted journal article supplement (http://www.qdcxjkg.com/highwire/filestream/126495/field_highwire_adjunct_files/7/ERJ-00937-2015_Figure_S8.pdf)

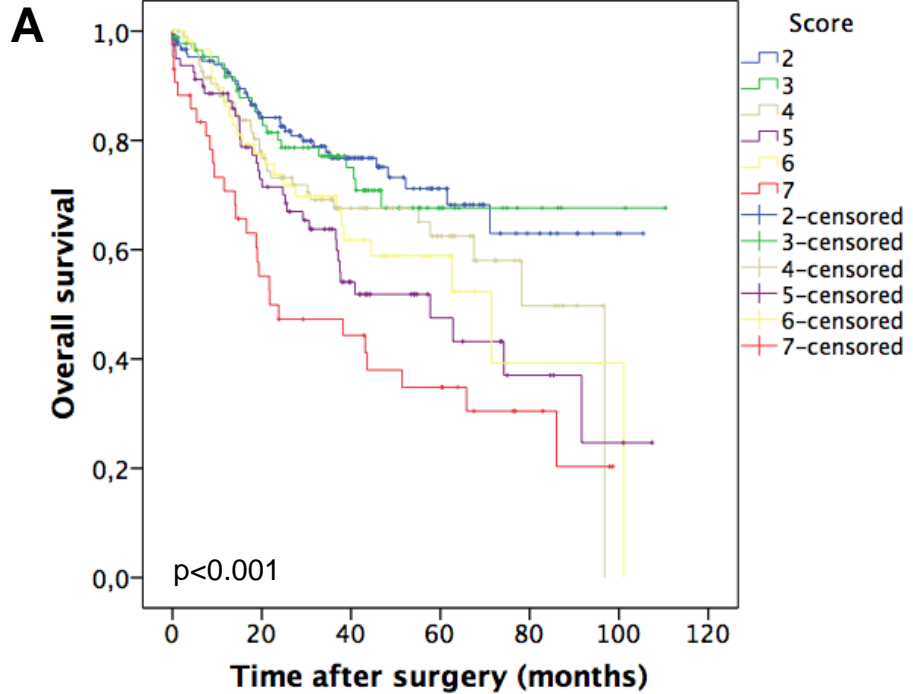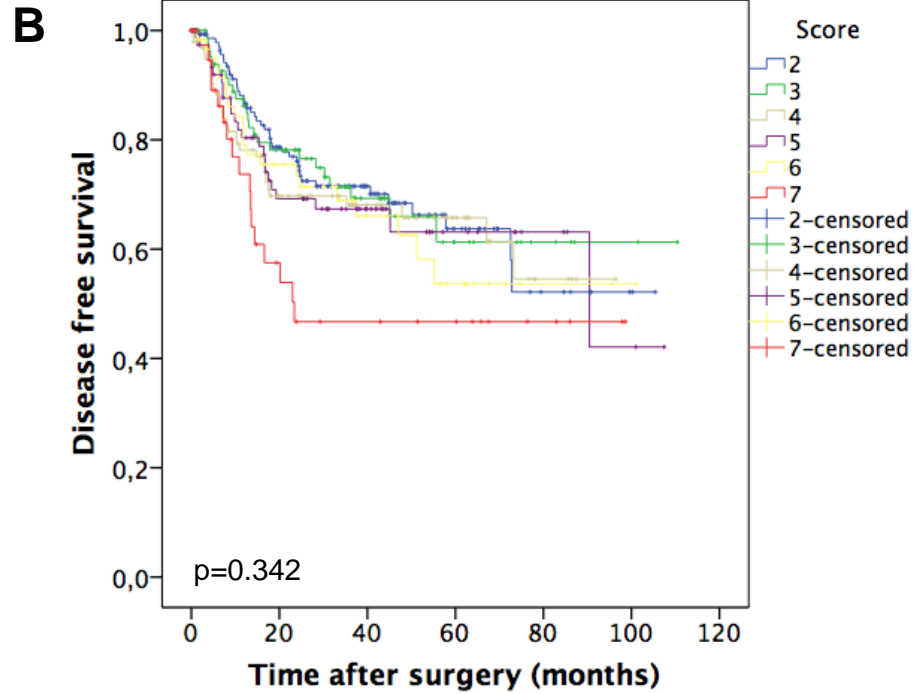

Supplement: ERJ-00937-2015_Figure_S8.pdf [file ERJ-00937-2015_Figure_S8.pdf]
